# Supplementary material
Source: publisher figshare collection journal article supplement (https://diabetesjournals.figshare.com/articles/dataset/_/23905920)
Supplement: Supplementary file 1 [file 1]

**Table S1.** CONSORT reporting guidelines checklist for a randomized controlled trial.

|                                                  | <b>Reporting Item</b>                                                                                                                                                                       | <b>Page Number</b> |
|--------------------------------------------------|---------------------------------------------------------------------------------------------------------------------------------------------------------------------------------------------|--------------------|
| <b>Title and Abstract</b>                        |                                                                                                                                                                                             |                    |
| Title                                            | Identification as a randomized trial in the title                                                                                                                                           | 1                  |
| Abstract                                         | Structured summary of trial design, methods, results, and conclusions                                                                                                                       | 3-4                |
| <b>Introduction</b>                              |                                                                                                                                                                                             |                    |
| Background and objectives                        | Scientific background and explanation of rationale                                                                                                                                          | 5-7                |
| Background and objectives                        | Specific objectives or hypothesis                                                                                                                                                           | 6                  |
| <b>Methods</b>                                   |                                                                                                                                                                                             |                    |
| Trial design                                     | Description of trial design (such as parallel, factorial) including allocation ratio.                                                                                                       | 7                  |
| Trial design                                     | Important changes to methods after trial commencement (such as eligibility criteria), with reasons                                                                                          | 8                  |
| Participants                                     | Eligibility criteria for participants                                                                                                                                                       | 8                  |
| Participants                                     | Settings and locations where the data were collected                                                                                                                                        | 7                  |
| Interventions                                    | The experimental and control interventions for each group with sufficient details to allow replication, including how and when they were actually administered                              | 9-10               |
| Outcomes                                         | Completely defined prespecified primary and secondary outcome measures, including how and when they were assessed                                                                           | 11                 |
| Outcomes                                         | Any changes to trial outcomes after the trial commenced, with reasons                                                                                                                       | n/a                |
| Sample size                                      | How sample size was determined                                                                                                                                                              | 11                 |
| Sample size                                      | When applicable, explanation of any interim analyses and stopping guidelines                                                                                                                | n/a                |
| Randomization - Sequence generation              | Method used to generate the random allocation sequence                                                                                                                                      | 7-8                |
| Randomization - Sequence generation              | Type of randomization; details of any restriction (such as blocking and block size)                                                                                                         | 7-8                |
| Randomization - Allocation concealment mechanism | Mechanism used to implement the random allocation sequence (such as sequentially numbered containers), describing any steps taken to conceal the sequence until interventions were assigned | 7-8                |
| Randomization - Implementation                   | Who generated the allocation sequence, who enrolled participants, and who assigned participants to interventions                                                                            | 7-8                |
| Blinding                                         | If done, who was blinded after assignment to interventions (for example, participants, care providers, those assessing outcomes) and how.                                                   | 7-8                |
| Blinding                                         | If relevant, description of the similarity of interventions                                                                                                                                 | n/a                |
| Statistical methods                              | Statistical methods used to compare groups for primary and secondary outcomes                                                                                                               | 11-12              |
| Statistical methods                              | Methods for additional analyses, such as subgroup analyses and adjusted analyses                                                                                                            | 11-12              |
| <b>Results</b>                                   |                                                                                                                                                                                             |                    |
| Participant flow diagram (strongly recommended)  | For each group, the numbers of participants who were randomly assigned, received intended                                                                                                   | Figure 1           |

|                          |                                                                                                                                                   |                         |
|--------------------------|---------------------------------------------------------------------------------------------------------------------------------------------------|-------------------------|
|                          | treatment, and were analysed for the primary outcome                                                                                              |                         |
| Participant flow         | For each group, losses and exclusions after randomization, together with reason                                                                   | Figure 1                |
| Recruitment              | Dates defining the periods of recruitment and follow-up                                                                                           | 7                       |
| Recruitment              | Why the trial ended or was stopped                                                                                                                | Figure 1                |
| Baseline data            | A table showing baseline demographic and clinical characteristics for each group                                                                  | Table 1                 |
| Numbers analysed         | For each group, number of participants (denominator) included in each analysis and whether the analysis was by original assigned groups           | Figure 1                |
| Outcomes and estimation  | For each primary and secondary outcome, results for each group, and the estimated effect size and its precision (such as 95% confidence interval) | 12-14, Table 1, Table 2 |
| Outcomes and estimation  | For binary outcomes, presentation of both absolute and relative effect sizes is recommended                                                       | Table 1                 |
| Ancillary analyses       | Results of any other analyses performed, including subgroup analyses and adjusted analyses, distinguishing pre-specified from exploratory         | n/a                     |
| Harms                    | All important harms or unintended effects in each group (For specific guidance see CONSORT for harms)                                             | Figure 1                |
| <b>Discussion</b>        |                                                                                                                                                   |                         |
| Limitations              | Trial limitations, addressing sources of potential bias, imprecision, and, if relevant, multiplicity of analyses                                  | 19-20                   |
| Generalisability         | Generalisability (external validity, applicability) of the trial findings                                                                         | 20                      |
| Interpretation           | Interpretation consistent with results, balancing benefits and harms, and considering other relevant evidence                                     | 14-20                   |
| Registration             | Registration number and name of trial registry                                                                                                    | 21                      |
| <b>Other information</b> |                                                                                                                                                   |                         |
| Interpretation           | Interpretation consistent with results, balancing benefits and harms, and considering other relevant evidence                                     | 14-20                   |
| Registration             | Registration number and name of trial registry                                                                                                    | 21                      |
| Protocol                 | Where the full trial protocol can be accessed, if available                                                                                       | 21                      |
| Funding                  | Sources of funding and other support (such as supply of drugs), role of funders                                                                   | 21                      |
