# Supplementary material
Source: publisher figshare collection journal article supplement (https://diabetesjournals.figshare.com/articles/dataset/_/23905920)
Supplement: Supplementary file 2 [file 1]

**Table S2.** Characteristics of provided diets by group for women who completed the study. (30-31 vs. 36-37 wks, mean values).

|                                                       | <b>LC/CONV</b>   | <b>CHOICE™</b>   | <b>LC/CONV</b>   | <b>CHOICE™</b>   |
|-------------------------------------------------------|------------------|------------------|------------------|------------------|
|                                                       | <b>30-31 wks</b> | <b>30-31 wks</b> | <b>36-37 wks</b> | <b>36-37 wks</b> |
| Energy Intake, kcal/d                                 | 2101             | 2098             | 2092             | 2132             |
| Carbohydrate, g/d                                     | 214              | 316              | 213              | 322              |
| Fat, g/d                                              | 106              | 59               | 106              | 60               |
| Protein, g/d                                          | 80               | 79               | 79               | 80               |
| Fiber, g/d                                            | 22               | 30               | 22               | 30               |
| Calcium, mg/d                                         | 799              | 732              | 798              | 747              |
| Iron, mg/d                                            | 12               | 17               | 12               | 17               |
| Cholesterol, mg/d                                     | 421              | 187              | 423              | 191              |
| Total Sugars, g/d                                     | 68               | 70               | 67               | 70               |
| Saturated fat, g/d                                    | 34               | 18               | 34               | 18               |
| Polyunsaturated fat, g/d                              | 24               | 14               | 25               | 14               |
| Monounsaturated fat, g/d                              | 39               | 21               | 39               | 22               |
| <b>Macronutrient Percentages<br/>of Total Energy*</b> |                  |                  |                  |                  |
| Carbohydrate,%                                        | 41               | 60               | 41               | 60               |
| Fat,%                                                 | 46               | 25               | 46               | 25               |
| Protein,%                                             | 15               | 15               | 15               | 15               |

\*Calculations are based on: Carbohydrate 4kcal/g, Fat 9kcal/g, Protein 4kcal/g
